# Supplementary material
Source: PubMed Central journal article supplement (PMC2811870)
Supplement: NIHMS28080-supplement-1.pdf [file NIHMS28080-supplement-1.pdf]

## **Supplementary Information Guide**

1. Sibanda-Supplementary.pdf (PDF file) containing supplementary information figures and their legends
2. Sibanda-SuppMovie.mov (Quicktime movie file) containing movie showing the 360 degrees view of a single DNA-PKcs molecule displayed as molecular surface.
