# Supplementary material
Source: PubMed Central journal article supplement (PMC2811870)
Supplement: NIHMS28080-supplement-2.pdf [file NIHMS28080-supplement-2.pdf]

## Supplementary Information

### Supplementary Table 1. Data collection, phasing and refinement statistics for DNA-PKcs and Ku80ct<sub>194</sub> complex crystal structure.

| Ta <sub>6</sub> Br <sub>12</sub> <sup>2+</sup> derivative |                         |                         |
|-----------------------------------------------------------|-------------------------|-------------------------|
| <b>Data collection</b>                                    |                         |                         |
| Space group                                               | P2 <sub>1</sub>         | P2 <sub>1</sub>         |
| Cell dimensions                                           |                         |                         |
| <i>a</i> , <i>b</i> , <i>c</i> (Å)                        | 164.91, 132.91, 291.29  | 165.05, 133.26, 292.34  |
| <i>α</i> , <i>β</i> , <i>γ</i> (°)                        | 90.0, 103.75, 90.0      | 90.0 103.86, 90.0       |
|                                                           | <i>Peak</i>             | <i>Inflection</i>       |
| Wavelength                                                | 1.2549                  | 1.2552                  |
| Resolution (Å)                                            | 100 - 6.6 (6.75 – 6.60) | 100 - 7.1 (7.27 – 7.10) |
| <i>R</i> <sub>merge</sub> (%)                             | 7.7 (55.0)              | 7.9 (63.1)              |
| < <i>I</i> /σ <i>I</i> >                                  | 10.1                    | 9.8                     |
| Completeness (%)                                          | 88.6 (74.9)             | 87.3 (70.7)             |
| Redundancy                                                | 3.2                     | 3.3                     |
| <b>Refinement</b>                                         |                         |                         |
| Resolution (Å)                                            | 100 – 6.6               |                         |
| No. reflections                                           | 22,653                  |                         |
| <i>R</i> <sub>work</sub> / <i>R</i> <sub>free</sub> (%)   | 44.2/44.1               |                         |
| No. Ala residues                                          | 4064                    |                         |
| modelled in asymmetric unit                               |                         |                         |

\*Highest resolution shell is shown in parenthesis.

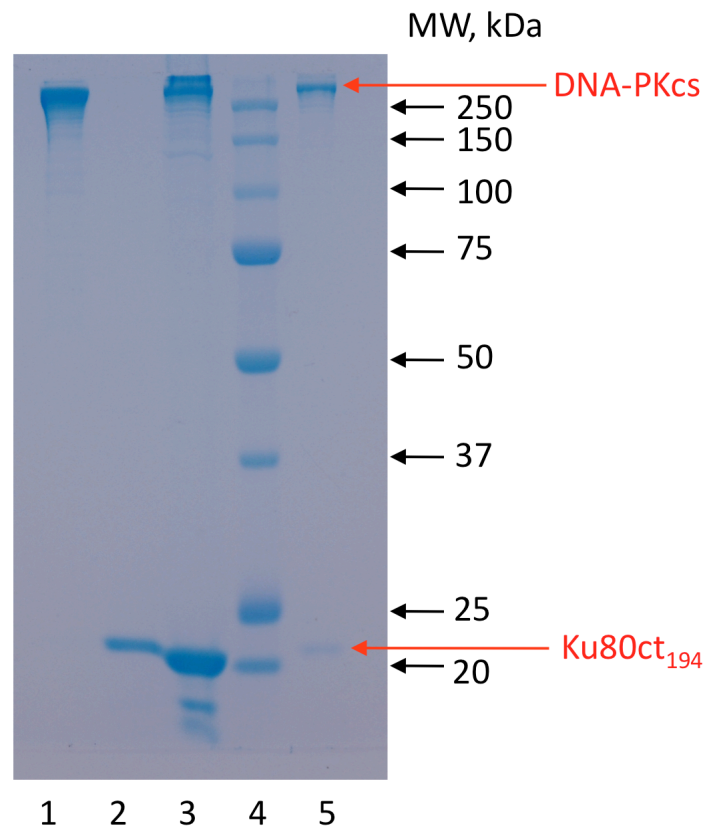

### Supplementary Figure 1. SDS-PAGE of DNA-PKcs.

A sodium dodecyl sulphate (SDS) poly-acrylamide gel showing in lanes: 1) purified full length DNA-PKcs; 2) expressed and purified Ku80ct<sub>194</sub> domain; 3) DNA-PKcs complexed with Ku80ct<sub>194</sub> domain; 4) Precision Plus protein standards from Bio-RAD; 5) washed and dissolved crystals showing the presence of DNA-PKcs and Ku80ct<sub>194</sub> designated by red arrows.

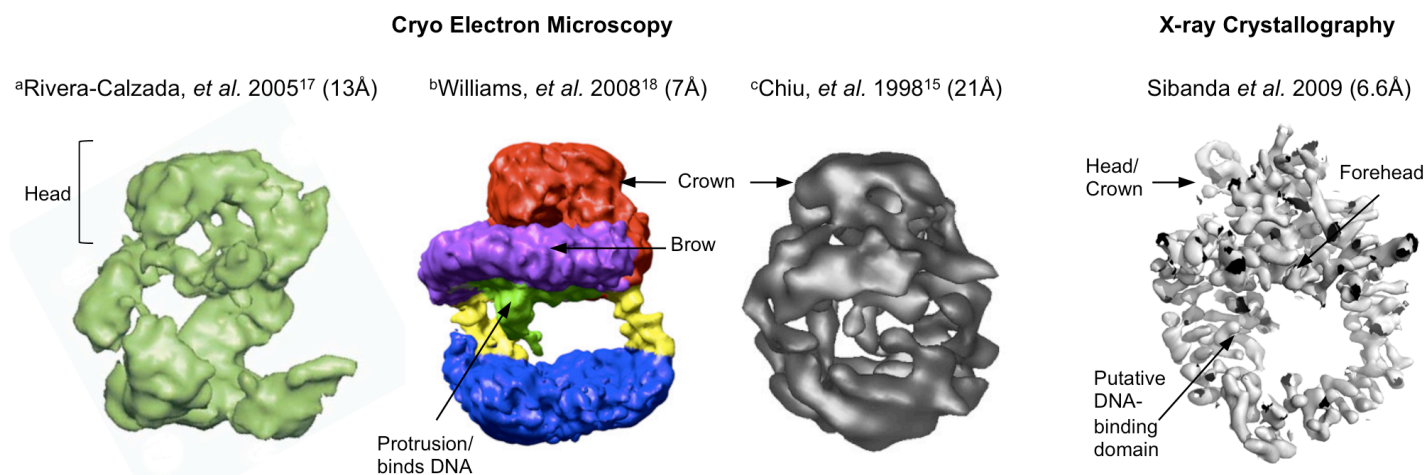

**Supplementary Figure 2. Equivalent views of DNA-PKcs as defined by cryo-electron microscopy and X-ray crystallography.**

References to the publications and resolutions of the models are given above. Colour-coding of these EM structures are as given in their respective publications. The X-ray crystallographic experimental  $F_o$  electron density map defined by the multi-wavelength anomalous dispersion method, is from the present work.

<sup>a</sup>Reprinted from *Structure*, vol. 13, A. Rivera-Calzada, J. P. Maman, L. Spagnolo, L. H. Pearl and O. Llorca, Three-Dimensional Structure and Regulation of the DNA-Dependent Protein Kinase Catalytic Subunit (DNA- PKcs), pp. 243-255, ©2005, with permission from Elsevier.

<sup>b</sup>Reprinted from *Structure*, vol. 16, D. R. Williams, K.-J. Lee, J. Shi, D. J. Chen and P. L. Stewart, Cryo-EM Structure of the DNA-Dependent Protein Kinase Catalytic Subunit at Subnanometer Resolution Reveals  $\alpha$  Helices and Insight into DNA Binding, pp. 468-477, ©2008, with permission from Elsevier.

<sup>c</sup>Reprinted from *Journal of Molecular Biology*, vol. 284, C. Y. Chiu, R. B. Cary, D. J. Chen, S. R. Peterson and P. L. Stewart, Cryo-EM Imaging of the Catalytic Subunit of the DNA-Dependent Protein Kinase, pp. 1075-1081, ©1998, with permission from Elsevier.

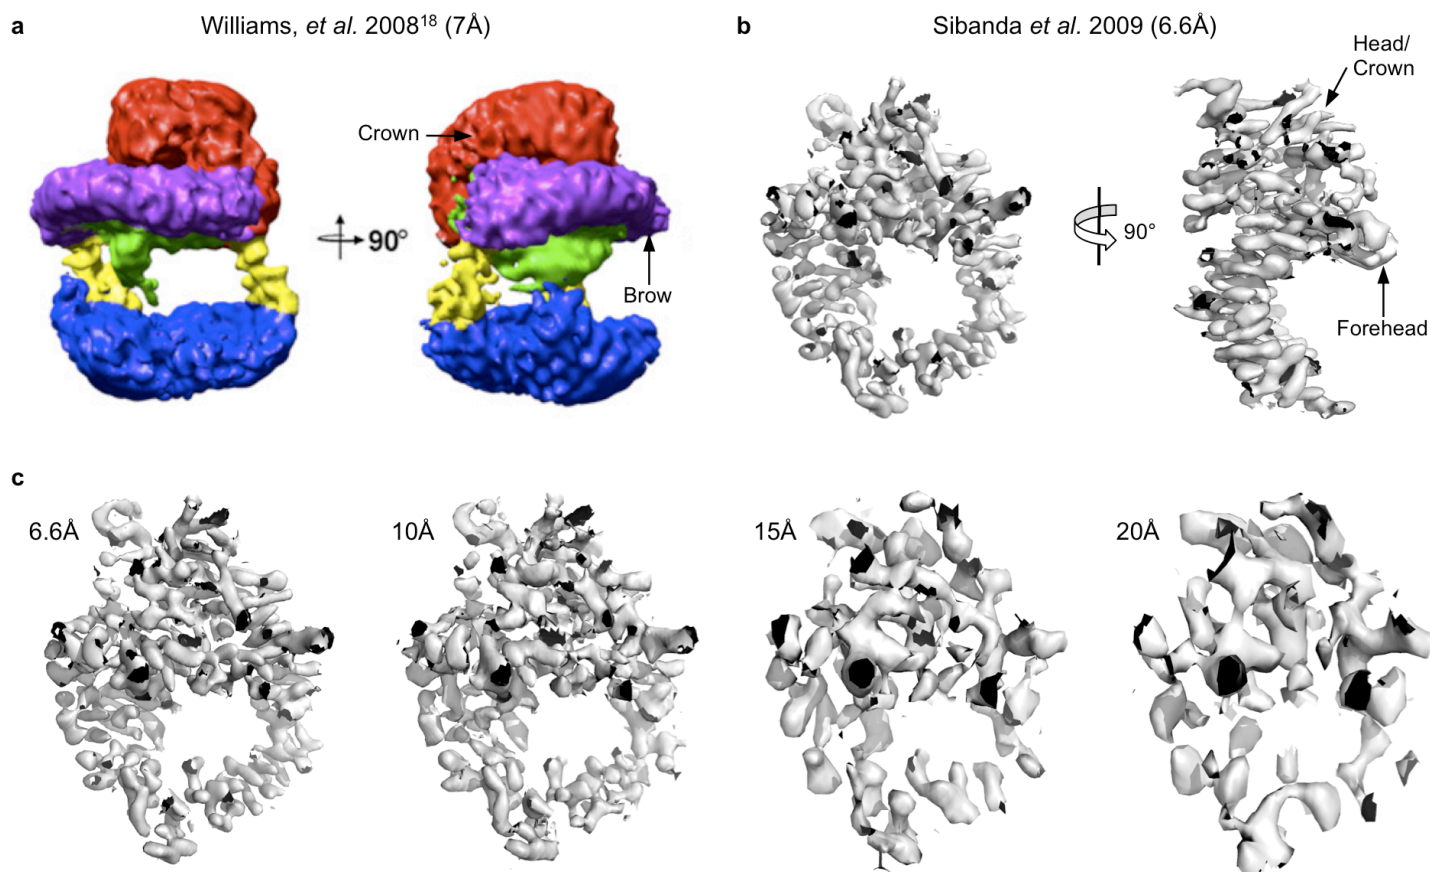

**Supplementary Figure 3. Equivalent orthogonal views of DNA-PKcs as defined.**

a) By cryo-electron microscopy<sup>18</sup> at 7Å resolution (but at 6.7 Å resolution when estimated by the Fourier shell correlation at the 0.5 threshold; colour-coding of the EM structure is as given in Williams, *et al.*<sup>18</sup>) and b) X-ray crystallographic experimental  $F_o$  density at 6.6Å resolution defined by the multi-wavelength anomalous dispersion method from the present work. c) X-ray crystallographic experimental  $F_o$  electron density map recalculated with various resolution cut-offs (all are contoured at 1.0 sigma level) for comparison with the electron microscopy models in Supplementary Figure 2.

a) Reprinted from Structure, vol. 16, D. R. Williams, K.-J. Lee, J. Shi, D. J. Chen and P. L. Stewart, Cryo-EM Structure of the DNA-Dependent Protein Kinase Catalytic Subunit at Subnanometer Resolution Reveals  $\alpha$  Helices and Insight into DNA Binding, pp. 468-477, ©2008, with permission from Elsevier.

**Supplementary Movie 1.**

This movie shows the 360 degrees view of a single DNA-PKcs molecule displayed as molecular surface. The colour-coding of the molecule is as follows: green – the ring structure; light green – the forehead that is part of the ring structure; cyan – the putative DNA-binding domain; magenta – the larger C-terminal region that carries the FAT and FATC domains; yellow – the kinase domain (QuickTime; 7.6 MB).
